# Supplementary material
Source: Springer Nature journal article supplement (https://www.springermedizin.de/resource/supplementary/12885_2008_1371_MOESM1_ESM.pdf/9472704)

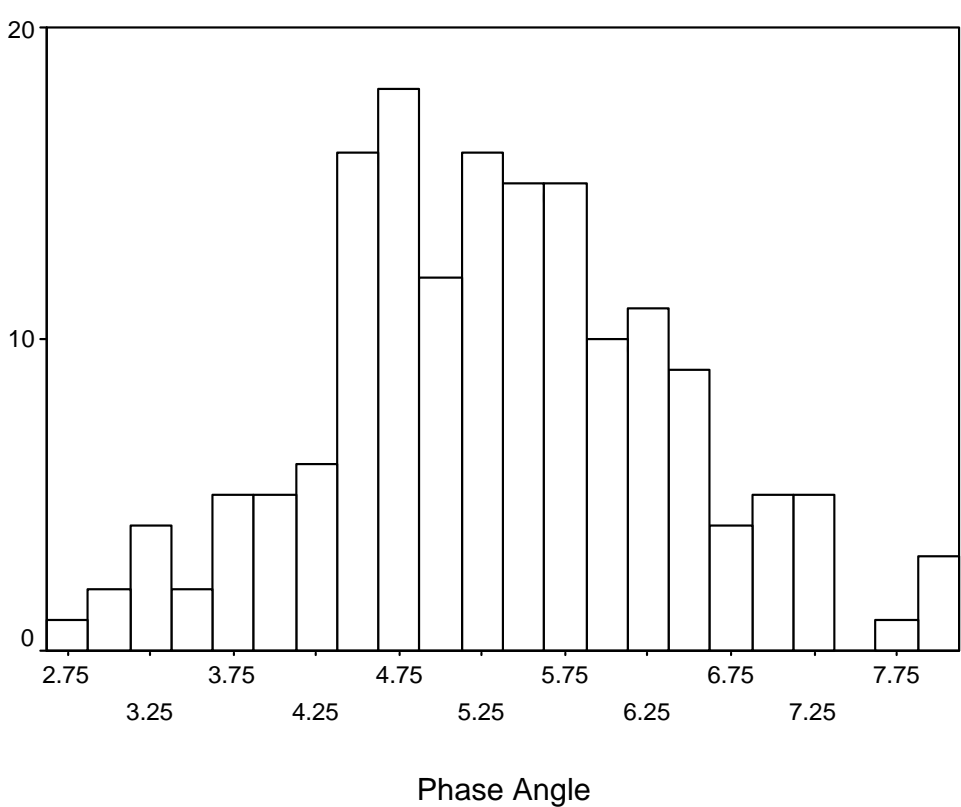

Supplement: MOESM1 [file 9472704]
